# Supplementary material for: Cardiovascular Progerin Suppression and Lamin A Restoration Rescue Hutchinson-Gilford Progeria Syndrome
Source: PubMed Central journal article supplement — Circulation. 2021 Oct 25;144(22):1777–94. doi: 10.1161/CIRCULATIONAHA.121.055313 (PMC8614561; doi:10.1161/circulationaha.121.055313), 2021-10-25
Supplement: cir-144-1777-s001.pdf [file cir-144-1777-s001.pdf]

## SUPPLEMENTAL MATERIAL

### Cardiovascular progerin suppression and lamin A restoration rescues Hutchinson-Gilford progeria syndrome

Amanda Sánchez-López PhD<sup>1,2,†</sup>, Carla Espinós-Estévez MS<sup>1,†</sup>, Cristina González-Gómez BS<sup>1,2</sup>, Pilar Gonzalo PhD<sup>1,2</sup>, María J. Andrés-Manzano<sup>1,2</sup>, Víctor Fanjul PhD<sup>1,2</sup>, Raquel Riquelme-Borja MS<sup>1</sup>, Magda R. Hamczyk PhD<sup>1,2</sup>, ††, Álvaro Macías PhD<sup>1,2</sup>, Lara del Campo PhD<sup>1,2</sup>, Emilio Camafeita PhD<sup>1,2</sup>, Jesús Vázquez PhD<sup>1,2</sup>, Anna Barkaway PhD<sup>3</sup>, Loïc Rolas PhD<sup>3</sup>, Sussan Nourshargh PhD<sup>3</sup>, Beatriz Dorado PhD<sup>1,2</sup>, Ignacio Benedicto PhD<sup>1</sup>, Vicente Andrés PhD<sup>1,2,\*</sup>

<sup>1</sup> Centro Nacional de Investigaciones Cardiovasculares Carlos III (CNIC), Madrid, Spain.

<sup>2</sup> CIBER de Enfermedades Cardiovasculares (CIBERCV), Spain.

<sup>3</sup> Centre for Microvascular Research, William Harvey Research Institute, Barts and The London School of Medicine and Dentistry, Queen Mary University of London, London, UK.

† Co-first authors with equal contribution

†† Current address: Departamento de Bioquímica y Biología Molecular, Instituto Universitario de Oncología (IUOPA), Universidad de Oviedo, 33006 Oviedo, Spain

\* Corresponding author:

Vicente Andrés

CNIC, Melchor Fernández Almagro 3, 28029 Madrid (Spain)

Phone: +34-91 453 12 00 (Ext. 1502)

E-mail: vandres@cnic.es

## CONTENT

- **Supplemental Methods**
- **Supplemental Table I:** Microinjection solution injected into zygotes and crRNA and tracrRNA sequences used.
- **Supplemental Table II:** Primer sequences used to identify founder *Lmna*<sup>HGPSrev</sup> mice and for genotyping *Lmna*<sup>HGPSrev</sup> mice and *Lmna*<sup>HGPSrev</sup>-*Ubc-CreER*<sup>T2</sup> mice.
- **Supplemental Figure I:** Double-stranded DNA donor template sequence used to generate the *Lmna*<sup>HGPSrev/HGPSrev</sup> (*HGPSrev*) mouse model and analysis of lamin A/C and progerin mRNA level.
- **Supplemental Figure II.** Progerin expression in *wild-type (WT)*, *Lmna*<sup>HGPSrev/HGPSrev</sup> (*HGPSrev*), and *HGPSrev-SM22α-Cre* mice.
- **Supplemental Figure III:** Analysis of potential off-target effects in *Lmna*<sup>HGPSrev/HGPSrev</sup> (*HGPSrev*) mice.
- **Supplemental Figure IV:** Plasma lipid concentrations in wild-type (*WT*) and *Lmna*<sup>HGPSrev/HGPSrev</sup> (*HGPSrev*) mice
- **Supplemental Figure V:** Quantification of lamin A and progerin expression in tissues of *HGPSrev-Ubc-CreER*<sup>T2</sup> mice treated with oil or tamoxifen.

## Supplemental Methods

### Analysis of potential off-target effects of CRISPR/Cas9 in *HGPSrev* mice

To examine potential off-target (OT) effects in *HGPSrev* mice, we used the online Off-Spotter tool (<https://cm.jefferson.edu/Off-Spotter/>). Taking as a reference the sequence of the 20-mer sgRNA that we used for Crispr/Cas9-dependent editing, this analysis identified 184 mouse genomic sequences containing 3, 4, or 5 mismatches (2, 16, and 166 sequences, respectively) (**Figure IIIA in the Supplement**). For off-target assessment, we chose 3-mismatch sequences (OT-1 and OT-2) and 6 of the 4-mismatch sequences (OT-3, OT-4, OT-5, OT-6, OT-7, and OT-8) (**Figure IIIB in the Supplement**), which were amplified by PCR using as template genomic DNA extracted from the tail of *WT* and *HGPSrev* mice (n=5 per genotype). PCR products were sequenced at the Centro Nacional de Investigaciones Oncológicas (CNIO, Madrid, Spain) using the Sanger method<sup>44</sup>.

### Protein extraction and western blotting

MEFs were directly lysed in cell-culture plates by scraping in SDS lysis buffer (4% SDS, 20% glycerol, and 120 mM Tris-HCl, pH 6.8). Extracts were incubated for 5 min at 95 °C and then passed 10 times through a 25-gauge needle. Protein concentration was determined from absorbance at 280 nm measured in a NanoDrop ND-1000 spectrophotometer (Nanodrop, Wilmington, DE USA).

Mouse tissues were collected, snap-frozen and preserved at -80 °C until further use. To obtain representative samples, frozen tissues were powdered and subsequently homogenized with a TissueLyser (Qiagen) in lysis buffer (50 mM Tris HCK pH 8.8, 2% SDS, 8 M Urea, 2 M thiourea). Lysates were sonicated in a Bioruptor Sonication System (Diagenode, Belgium) coupled to a Neslab RTE 7 Circulating Chiller (Thermo Fisher) for 10 min, lysed on a rotating wheel for 30-60 min at 4 °C (SB3 rotator; Stuart, Staffordshire, UK), and centrifuged at 16,000 g and 4 °C for 15 min. Protein concentration was determined by the Bradford method<sup>45</sup>, and equal amounts of protein were separated by SDS-PAGE and transferred to methanol activated Immobilon-FL polyvinylidene fluoride membranes (IPVH00010; Millipore, Burlington, MA USA) using a wet transfer system (Mini Trans-Blot® Cell; Bio-Rad, Hercules, CA USA). Membranes were blocked for 60 min with 5% bovine serum albumin (BSA) in Tris-buffered saline supplemented with 0.2% Tween 20 (TBS-T), followed by an overnight incubation at 4 °C with anti-lamin A/C (1:1,500 SC-376248; Santa Cruz Biotechnology, Dallas, TX USA) and anti-GAPDH (1:15,000 MAB374, Millipore) diluted in TBS-T

containing 5% BSA. After washing, membranes were incubated for 60 min at room temperature with horseradish peroxidase (HRP)-conjugated secondary antibody (SC-516102, Santa Cruz Biotechnology; 1:10,000 for GAPDH and 1:4,000 for lamin A/C) diluted in TBS-T, 5% BSA. Blots were incubated with Luminata Forte chemiluminescent HRP substrate (Millipore) and imaged using an ImagenQuant LAS 4000 mini system (GE Healthcare, Chicago, IL USA). Relative protein amounts were quantified with Image Studio Lite (LI-COR Biosciences, Lincoln, NE USA).

### **Proteomics analysis for the relative quantitation of farnesylated progerin**

**Protein extraction** – Frozen mouse hearts were powdered and processed for protein lysate preparation as described in the previous section but with lysis with RIPA buffer (50 mM Tris-HCl, 1% Triton X-100, 150 mM NaCl, 1 mM DTT, 0.1% SDS, 2 mM EDTA, 0.5% sodium deoxycholate). For immunoprecipitation, three lysates were pooled per genotype.

**Immunoprecipitation (IP)** – Six µg of anti-lamin A/C antibody (SC-376248; Santa Cruz Biotechnology) were used to generate antibody-Protein G conjugates (Dynabeads™ Protein G; Invitrogen). Protein extracts (450 µL; total protein: 675-720 µg) were added to Eppendorf tubes containing anti-lamin A/C-Dynabeads™, and mixtures were incubated for 2h at 4°C with rotation. Immunocomplexes were washed 6 times with an excess of PBS, using a DynaMag™ Magnet (Invitrogen) to retain the anti-lamin A/C-Dynabead-antigen complexes in the tube and allow removal of the supernatant in each wash. The washed material was resuspended in 45 µL PBS.

To assess specificity, controls included tubes containing only beads + antibody (CT1) and only beads + protein extract (CT2). As additional controls, we collected the supernatants directly after incubation with anti-lamin A/C-Dynabeads™ (from tubes with the DynaMag™ Magnet but before starting the washes).

**Western blot** – Samples were examined by western blot using the anti-lamin A/C antibody as described in the previous section.

**Protein digestion** – The dried anti-lamin A/C-Dynabead™-antigen complexes (approximately 80% of the post-immunoprecipitation volume) were resuspended in sample buffer (5% SDS, 10% glycerol, 25 mM Tris-HCl, pH 6.8, 10 mM dithiothreitol, 0.01% bromophenol blue) and boiled for 5 min to elute proteins. The magnetic beads were retained against the wall of the tubes with the DynaMag™ Magnet, and the supernatants were trypsin-digested separately using the one-step in-gel digestion protocol<sup>46</sup>. Briefly, protein solutions were loaded onto 1-cm wide wells of a conventional SDS-PAGE

gel (0.5 mm-thick, 4% stacking and 10% resolving). The run was stopped when the front entered 2 mm into the resolving gel, so that the proteins became concentrated at the stacking/resolving gel interface. The unseparated protein bands were visualized by Coomassie staining, excised, cut into pieces, treated with dithiothreitol (Sigma-Aldrich) and iodoacetamide (Sigma-Aldrich), and digested overnight at 37°C with trypsin (Promega). The resulting tryptic peptides were acidified with trifluoroacetic acid (Sigma-Aldrich), desalted in RP C-18 extraction cartridges (Oasis; Waters, Milford, MA USA), and dried.

**Targeted precursor-reaction monitoring (PRM) analysis** – Targeted liquid chromatography coupled to tandem mass spectrometry (LC-MS/MS) analysis of mouse heart samples was carried out by high-resolution PRM in an Ultimate 3000 nano-HPLC apparatus (Dionex, Sunnyvale, CA USA) coupled to a hybrid quadrupole-orbitrap mass spectrometer (Q Exactive HF; Thermo Scientific). Peptides were separated on a C-18 RP nanocolumn (75 µm I.D., 50 cm, Easy-spray C18; Thermo Scientific) using a 200 nL/min flow and a continuous gradient consisting of 5-45% B for 80 min and 45-90% B for 4 min (B: 90% acetonitrile, 0.1% formic acid). Each MS run consisted of enhanced FT-resolution spectra (120,000 resolution) in the 400-1200 m/z range followed by time-scheduled data-independent acquisition of MS<sup>2</sup> spectra from the precursor ions. Every cycle of data-independent full-MS precursor and fragment scans was repeated along the corresponding time segment. Extracted ion chromatograms of selected ion fragments were obtained with Xcalibur 2.2 (Thermo Fisher).

### **Magnetic resonance imaging (MRI)**

MRI studies were performed at the CNIC Advanced Imaging Unit using a 7-T Agilent/Varian scanner (Agilent Technologies, Santa Clara, CA USA) equipped with a DD2 console and an actively shielded 115/60 gradient. For image acquisition, mice were sedated with 2% isoflurane in oxygen, and an ophthalmic gel was applied to prevent retinal drying. Body-fat images were acquired using a spin-echo multi-slice (SEMS) sequence with and without fat saturation and with the following parameters: 533-884 ms repetition time (varies between with and without fat saturation), 10.44 ms echo time, 128 x 128 acquisition matrix, 90° flip angle, 1 average and 35 1-mm slices with a 1 mm gap. Images were analyzed using Fiji-ImageJ and Amira software. Fat was segmented from each slice to obtain the fat volume. Fat mass was calculated as the product of fat volume and fat density (0.9 g/cm<sup>3</sup>).

**Supplemental Table I. Microinjection solution injected into zygotes and crRNA and tracrRNA sequences used**

| <b>Microinjection Solution</b> |                                                                                                                                                                                                                                                                                                                                                                                                                            |
|--------------------------------|----------------------------------------------------------------------------------------------------------------------------------------------------------------------------------------------------------------------------------------------------------------------------------------------------------------------------------------------------------------------------------------------------------------------------|
|                                | <ul style="list-style-type: none"> <li>• 0.61 <math>\mu</math>M sgRNA: 0.61 <math>\mu</math>M crRNA and 0.61 <math>\mu</math>M tracrRNA</li> <li>• <i>Streptococcus pyogenes</i> Cas9 endonuclease, with nuclear localization signal 8NLS (PNA Bio, Cat. CP01-50)</li> <li>• DsDNA donor template (2494 bp): 4.5 mg/<math>\mu</math>L</li> <li>• 10x microinjection buffer: 100 mM Tris-HCl pH 7.5, 1.0 mM EDTA</li> </ul> |

| <b>RNA sequence (5' <math>\rightarrow</math> 3')</b> |                                                                           |
|------------------------------------------------------|---------------------------------------------------------------------------|
| crRNA                                                | CCCAUAAGUGUCUAAGAUUCGUUUUAGAGCUAUGCUGUUUUG                                |
| tracrRNA                                             | AGCAUAGCAAGUUAUUUUUAAAGGCUAGUCCGUUAUCAACUUGAAAAAGUGG<br>CACCGAGUCGGUGCUUU |

**Supplemental Table II. Primer sequences used to identify founder *Lmna*<sup>HGPSrev</sup> mice and for genotyping *Lmna*<sup>HGPSrev</sup> mice and *Lmna*<sup>HGPSrev</sup>-*Ubc-CreERT2* mice**

| <b>Founders</b>                | <b>Forward (5' → 3')</b> | <b>Reverse (5' → 3')</b>  |
|--------------------------------|--------------------------|---------------------------|
| <b>PCR-1</b>                   | CCTTCCACCCTATTGCATGC     | TTCAGGCCTGCTCTCCTAAG      |
| <b>PCR-2</b>                   | CATCTGTTGTTTGCCCCTCC     | CTTCCCTGGGCTCCTAGAG       |
| <b>PCR-3</b>                   | AGAGTCGGTTGAACTCCCTG     | CATGATGCTGCAGTTCTGGG      |
| <b>Genotyping</b>              | <b>Forward (5' → 3')</b> | <b>Reverse (5' → 3')</b>  |
| <i>Lmna</i> <sup>HGPSrev</sup> | TCTTCCTCTTGATTGCCCA      | TAGCCAGGAAGCCTTCGAAA      |
| <i>Ubc-CreERT2</i>             | CGGTGCATGCAACGAGTGATGAGG | CCAGAGACGGAAATCCATCGCTCG  |
| <i>SM22α-Cre</i> *             | CTAGGCCACAGAATTGAAAGATCT | GTAGGTGGAAATTCTAGCATCATCC |
|                                | GCGGTCTGGCAGTAAAACTATC   | GTGAAACAGCATTGCTGTCACTT   |

\* Genotyping was according to the protocol from The Jackson Laboratories (Bar Harbor, ME USA), available at:

<https://www.jax.org/Protocol/UrlAsPDF?stockNumber=017491&protocolID=22392>

Supplemental Figure I (see legend on next page)

A

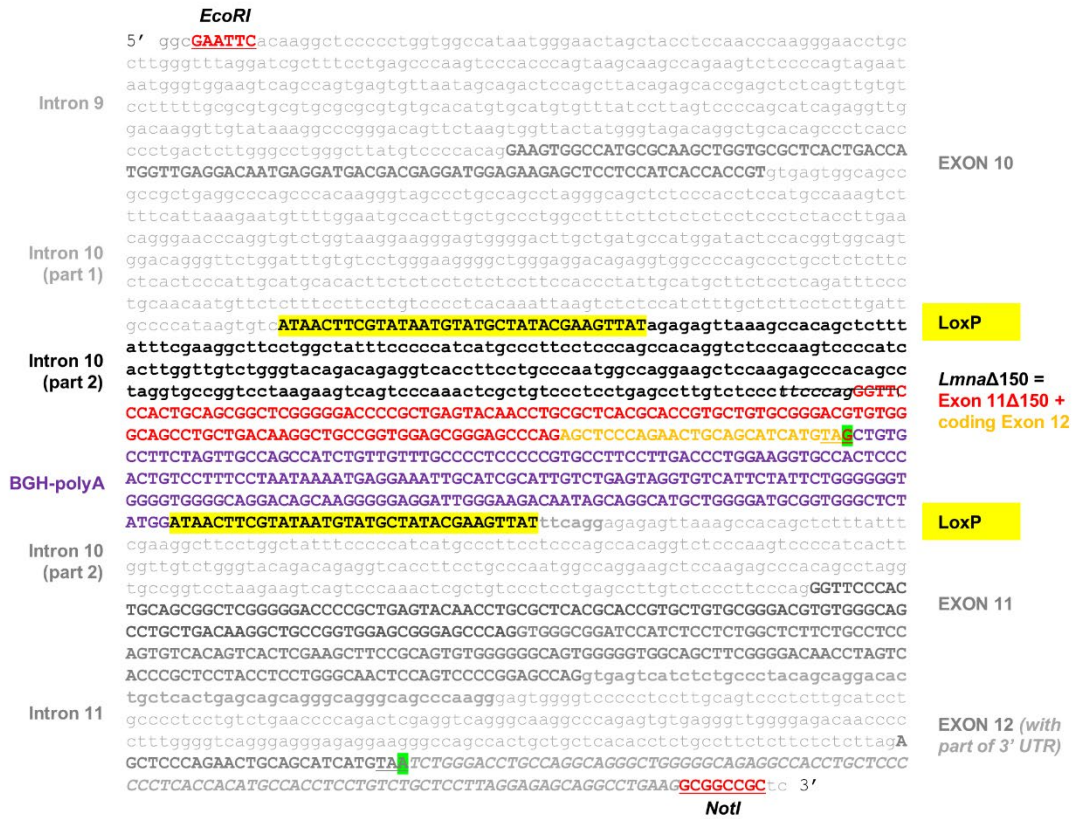

B

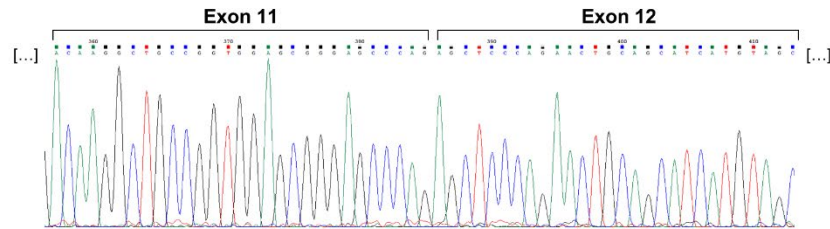

C

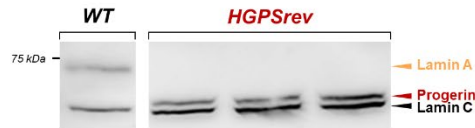

D

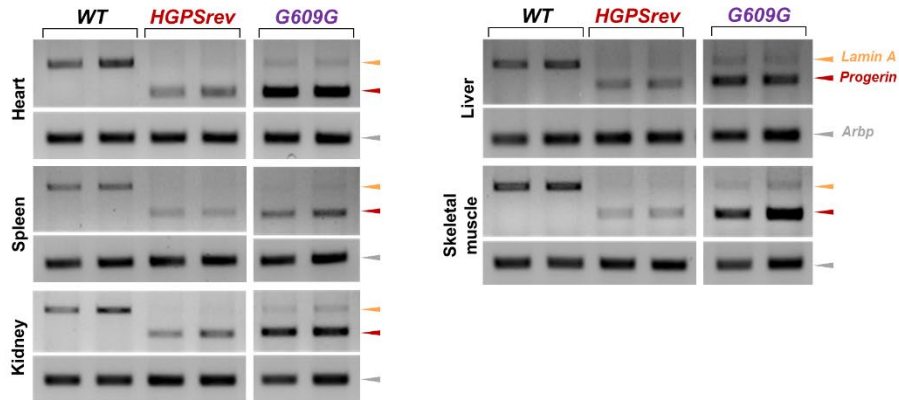



**Supplemental Figure I. Double-stranded DNA donor template sequence used to generate the *Lmna*<sup>HGPSrev/HGPSrev</sup> (HGPSrev) mouse model and analysis of lamin A/C and progerin expression. (A)** The reference DNA sequence used is the one available in the NCBI gene database (Gene ID: 16905, Chromosome 3, NC\_000069.6, 88481148..88509932, complement). The 672-bp insert (**see Fig.1A**) contains flanking loxP sites (highlighted in yellow) and harbors part of intron 10 ('part 2', black bold typeface), exon 11 lacking the last 150 bp (bold red typeface), exon 12 (orange bold typeface), and a transcription stop signal (BGH-poly A sequence, purple bold typeface). The left (938 bp) and right (877 bp) homology arms are shown in light gray. Underlined red upper case letters show the *EcoRI* (5') and *NotI* (3') restriction enzyme sites used to clone the whole sequence into the pcDNA3.1 expression vector (GenScript). Green-highlighted typeface shows single base changes introduced to avoid the possible generation of alternative splice sites. **(B)** Representative genomic sequencing of the four HGPSrev founder mice that were generated, showing the fusion between exon 11 $\Delta$ 150 and exon 12 without intron 11 in the *Lmna* gene. **(C)** Western blot analysis of lamin A isoforms in protein lysates from tails of founder HGPSrev mice and one wild-type control mouse (WT). **(D)** Lamin A and progerin mRNA expression in tissues of 3-month-old wild-type (WT), HGPSrev, and *Lmna*<sup>G609G/G609G</sup> (G609G) mice analyzed by semiquantitative PCR. Six mice of each genotype were analyzed, and representative images are shown of two mice per genotype. For each individual tissue, all PCR products were run on the same agarose gel and one image of the whole gel was acquired (lanes between HGPSrev and G609G samples have been omitted). *Arbp* expression was used as an internal control. Wells in the electrophoresis gels for western blotting and PCR analysis were loaded with samples from different mice.

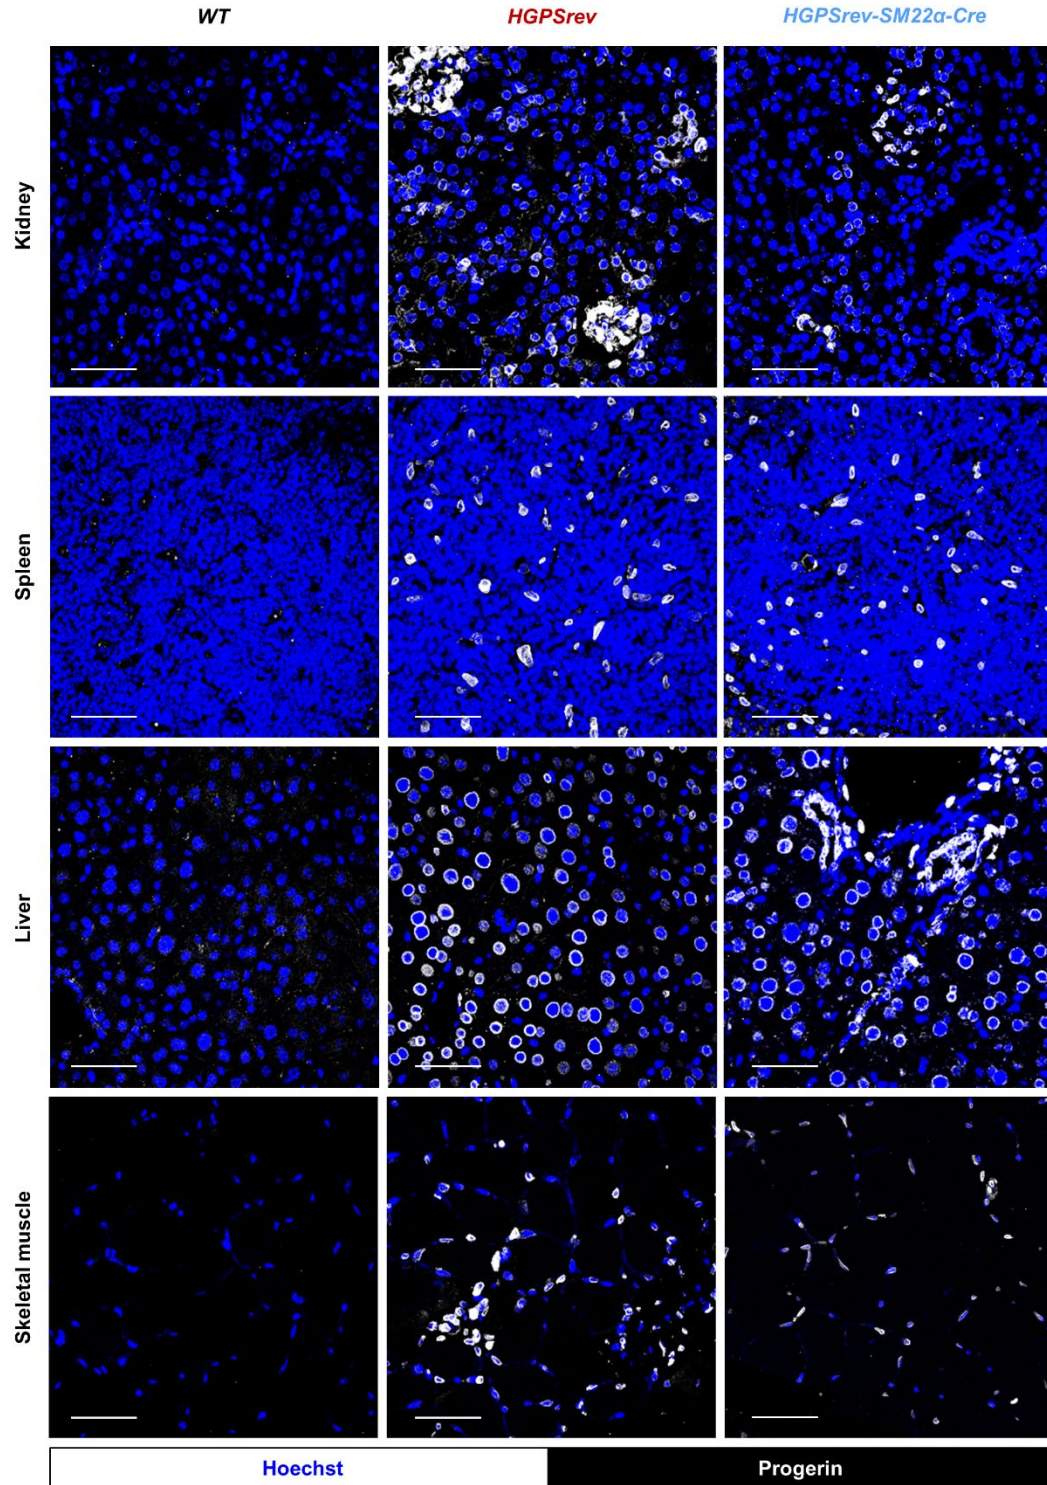

**Supplemental Figure II. Progerin expression in *wild-type (WT)*, *Lmna*<sup>*HGPSrev/HGPSrev*</sup> (*HGPSrev*), and *HGPSrev-SM22α-Cre* mice.** Mice were sacrificed at  $\approx$ 13 months of age. Representative immunofluorescence images of kidney, spleen, liver, and skeletal muscle cross-sections co-stained with anti-progerin antibody (white) and Hoechst 33342 (blue) to visualize progerin and nuclei, respectively. Scale bar, 50  $\mu$ m.

Supplemental Figure III (see legend at the end of the figure)

**A**

| 20mer RNA           | Number of mismatches | Number of results |
|---------------------|----------------------|-------------------|
| CCCATAAGTGCTAAGATTC | 1                    | 0                 |
|                     | 2                    | 0                 |
|                     | 3                    | 2                 |
|                     | 4                    | 16                |
|                     | 5                    | 166               |

**B**

| Target site <sup>1</sup> | DNA sequence <sup>2</sup>                                  | Genomic coordinates     | Primers 3'→5' <sup>3</sup>                                 |
|--------------------------|------------------------------------------------------------|-------------------------|------------------------------------------------------------|
| OT-1                     | CCCATATGTG <b>ACCA</b> AAGATTC <b>GGG</b>                  | Chr11:69102215-69102237 | Fwd: CTGCCGAATCAGGTAAGGAG<br>Rv: TCAGCTAGTGCCTCCCAAAC      |
| OT-2                     | CCCATA <b>ACAG</b> TTAAGATTC <b>AGG</b>                    | Chr1:70316671-70316693  | Fwd: TGCTTAACCGAGTACAAGCAC<br>Rv: GAAGAGCATTGGAATTTTAGCA   |
| OT-3                     | <b>ACCA</b> GAAAGTGTTTAGATTC <b>AGG</b>                    | Chr13:11805628-11805650 | Fwd: CACAGTGTGACACAGGCTCA<br>Rv: CAGTTCACATGCCCACTCAT      |
| OT-4                     | <b>ACC</b> TAA <b>AA</b> GTTAAGATTC <b>TGG</b>             | Chr7:55876988-55877010  | Fwd: GGAAAGAGAACATAAAGCCGTA<br>Rv: CACTAGTACTGGAACCTCCAGAG |
| OT-5                     | <b>CGCA</b> <b>AA</b> AG <b>CG</b> TGTAAGATTC <b>TGG</b>   | Chr10:81829700-81829722 | Fwd: CTCACAAAACCTTTGCTT<br>Rv: TGCAGCCAATCAGGGAGT          |
| OT-6                     | <b>CAC</b> AT <b>CAG</b> TGTCT <b>GT</b> GATTCT <b>TGG</b> | Chr7:14516664-14516686  | Fwd: TTTCCAGGAGGAAGGGAAAC<br>Rv: CTGGTCATGATTCTGCAGTCA     |
| OT-7                     | <b>CAC</b> ATATGTGT <b>TC</b> AAGATTC <b>TGG</b>           | Chr4:4841473-4841495    | Fwd: TCCAGACTATTGGCACAAAGC<br>Rv: TGGCATGCTTAGATTTTGA      |
| OT-8                     | CC <b>TC</b> CAG <b>AG</b> TCTAAGATTC <b>TGG</b>           | Chr6:54936060-54936082  | Fwd: TCCACGTGGTTGACTTCTGT<br>Rv: CTTTGCCGGCACTTGTATT       |

**C**

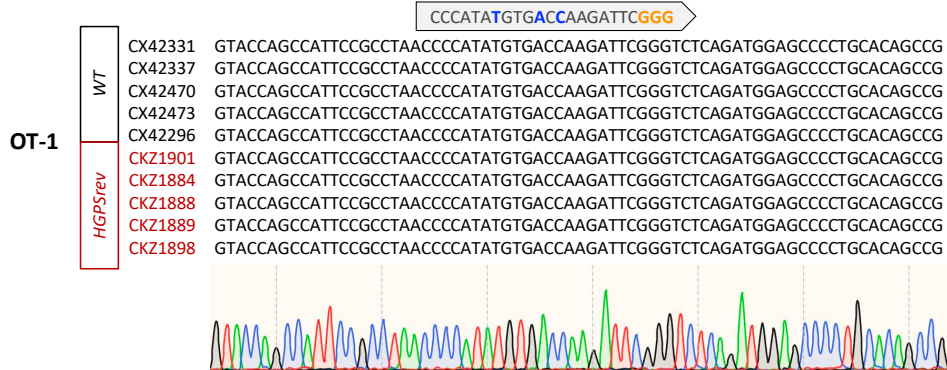

C

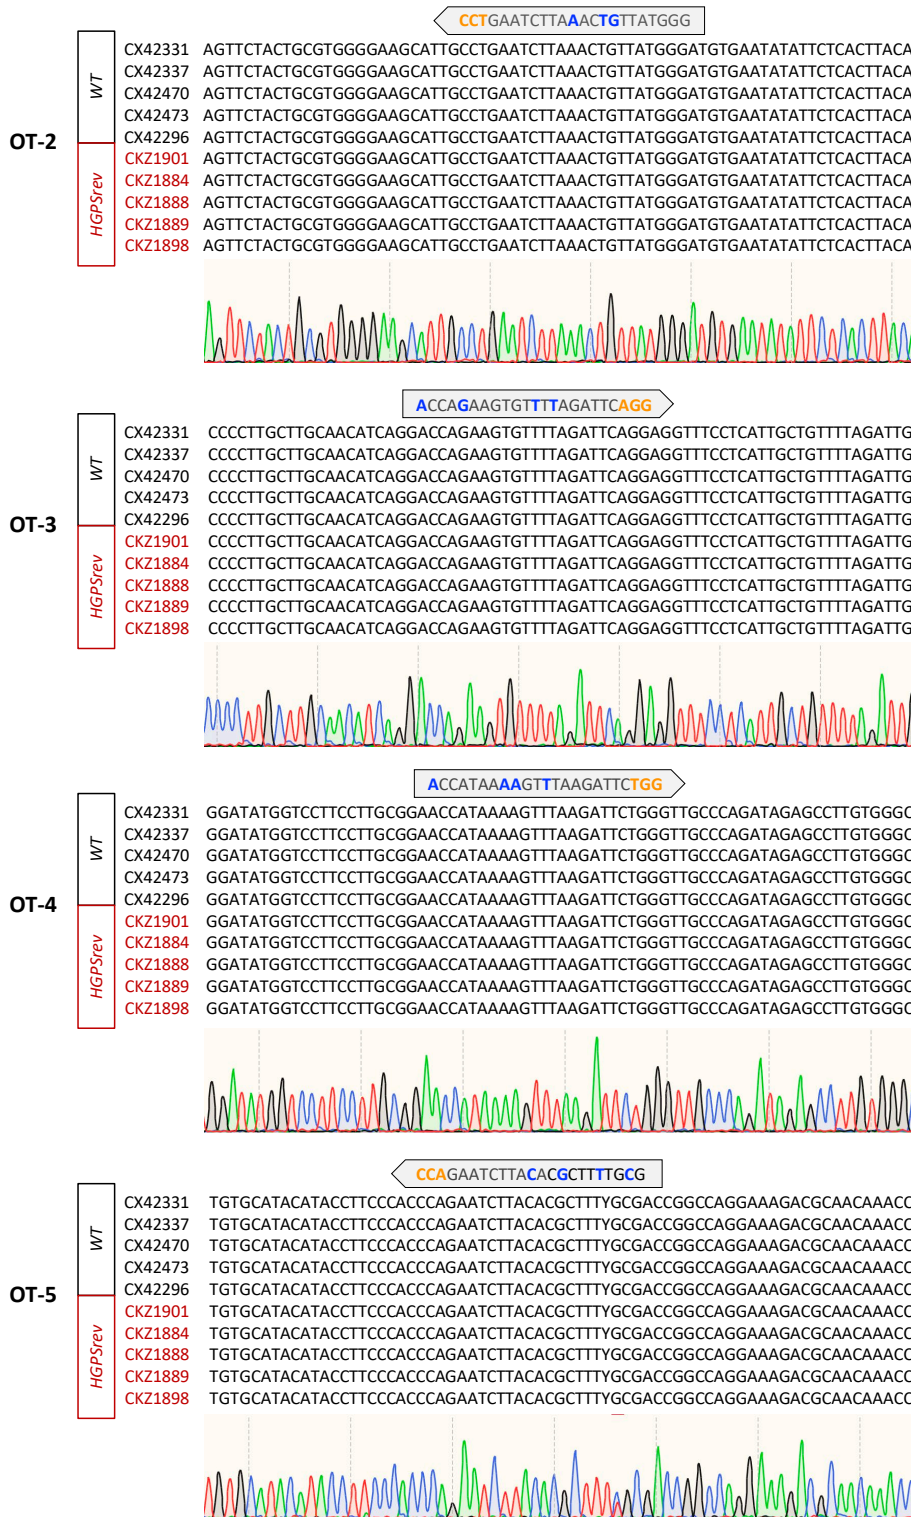

**C**

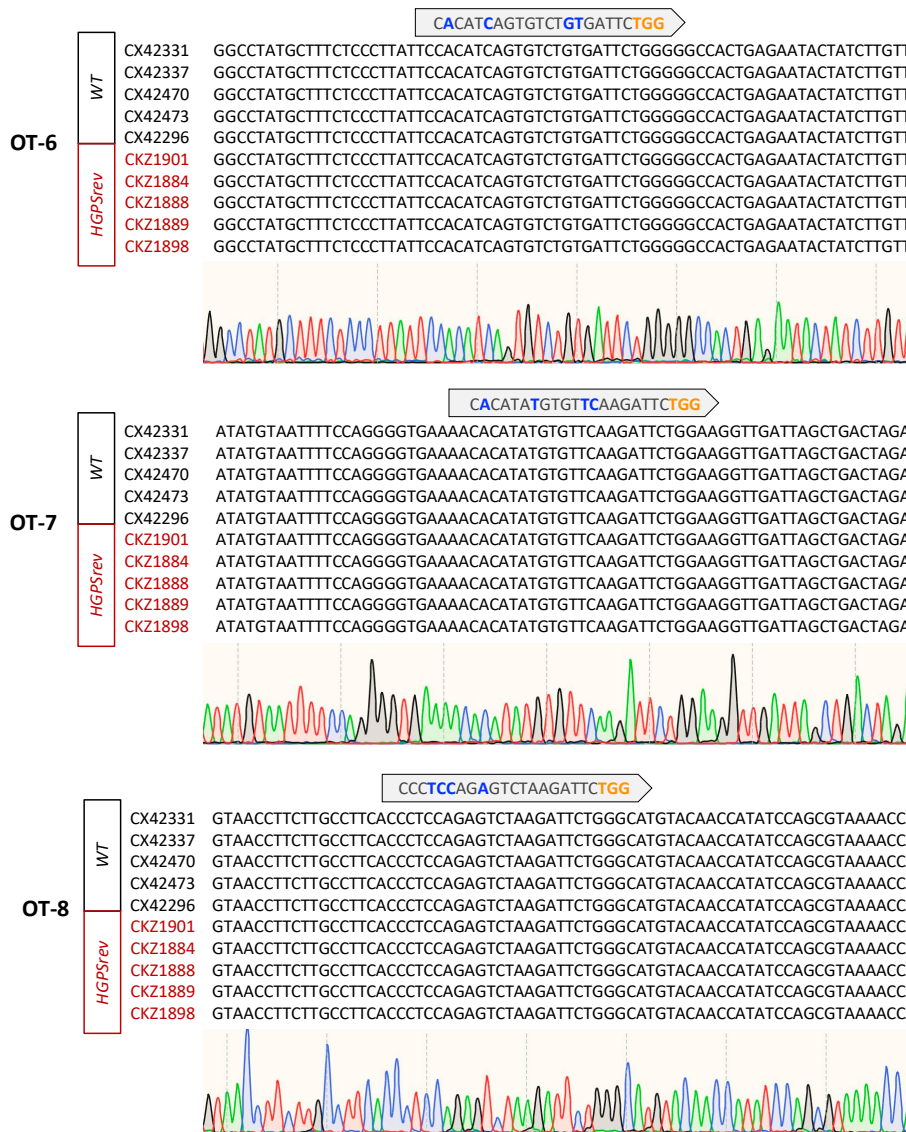

**Supplemental Figure III: Analysis of potential off-target effects in *Lmna*<sup>HGPSrev/HGPSrev</sup> (*HGPSrev*) mice. (A) The online Off-Spotter tool was used to identify mouse genomic sequences containing up to 5 mismatches compared with the sgRNA used for Crispr/Cas9-dependent editing. The analysis identified 184 sequences containing 3, 4, and 5 mismatches (2, 16, and 166 sequences, respectively). (B) Sequence of the 8 potential off-target (OT) sites identified in A that we selected for PCR amplification of genomic DNA and sequencing, which included the 2 sequences containing 3 mismatches (OT-1, OT-2) and 6 with 4 mismatches (OT-3 to OT-8). The table shows the sequence of each OT sequence (blue: mismatches; orange: PAM sequence), their genomic coordinates, and the primers designed for PCR. (C) Alignment of the sequences for each OT sequence in wild-type (*WT*) and *HGPSrev* mice (n=5 per genotype). The OT sequence is shown above each alignment (color codes as in A). Representative chromatograms are shown below the alignments, where blue, red, green, and black correspond to C, T, A, and G, respectively. Note that sgRNA can be on the positive or negative DNA strand; hence the negative strands are shown as the reverse complementary sequence. The Y base in both *WT* and *HGPSrev* samples in the OT-5 analysis indicates heterozygosity at this position (C and T).**



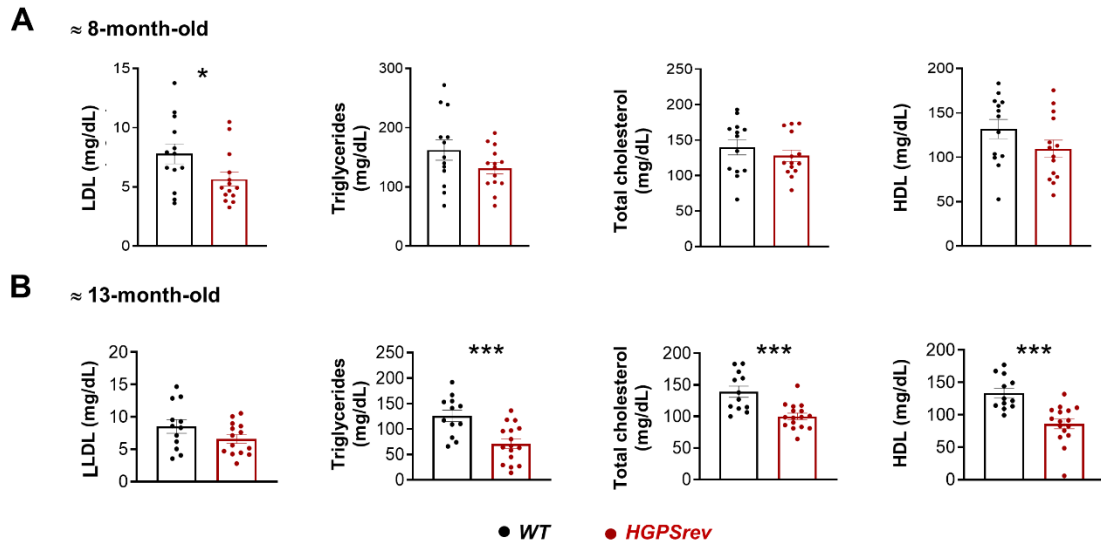

**Supplemental Figure IV. Plasma lipid concentrations in *wild-type* (WT) and *Lmna*<sup>*HGPSrev/HGPSrev*</sup> (*HGPSrev*) mice. (A)  $\approx$ 8-month-old mice. (B)  $\approx$ 13-month-old mice. Each symbol represents one animal. Statistical analysis was performed by two-tailed t-test. \*,  $p < 0.05$ ; \*\*\*,  $p < 0.001$ . HDL, high-density lipoprotein; LDL, low-density lipoprotein.**

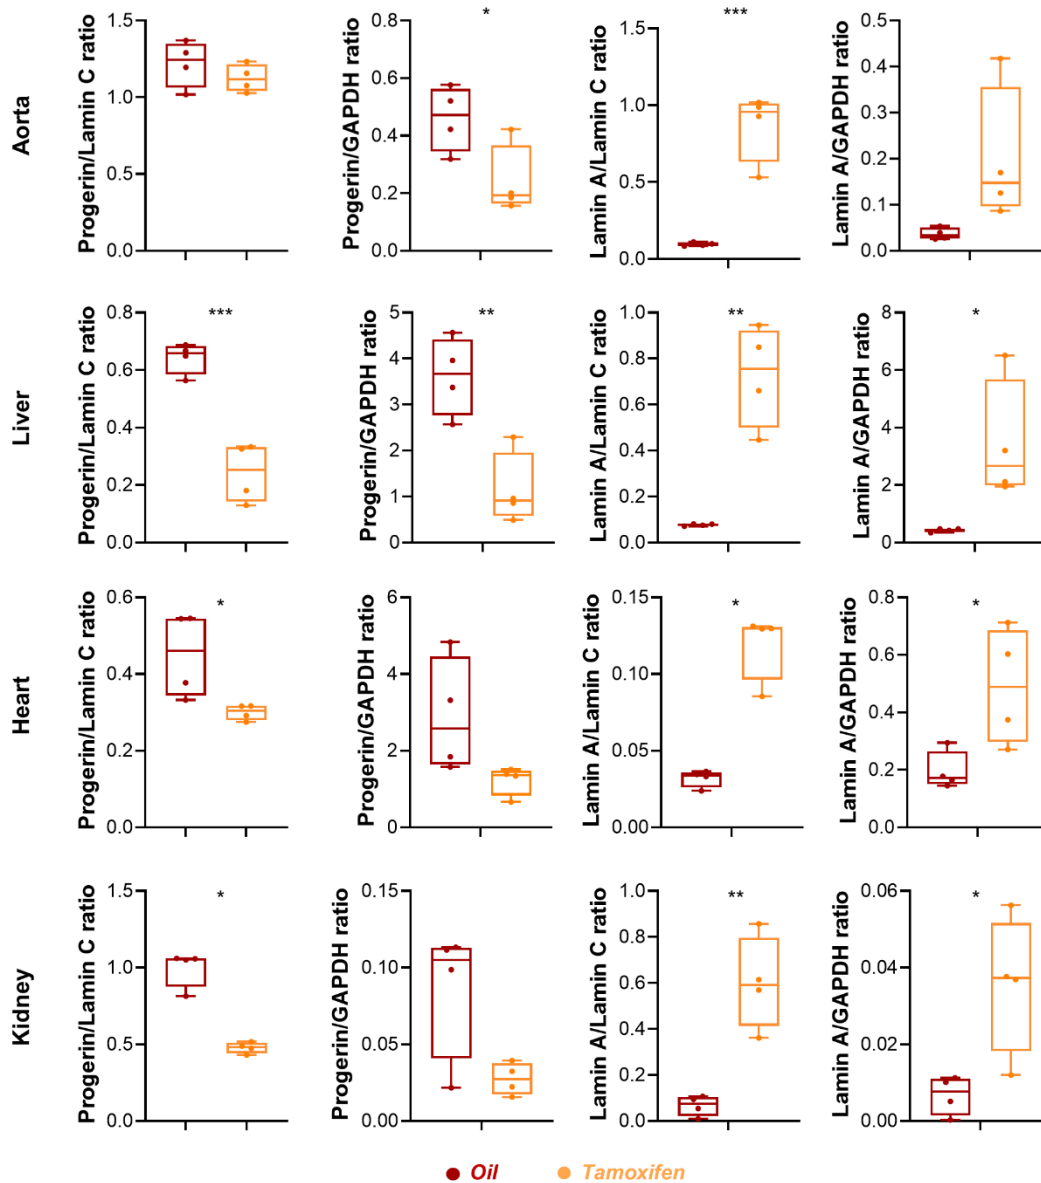

**Supplemental Figure V. Quantification of lamin A and progerin expression in tissues of *HGPS<sup>rev-Ubc-CreER<sup>T2</sup></sup>* mice treated with oil and tamoxifen.** The relative abundance of lamin A and progerin proteins in the western blots shown in Figure 6C was quantified using the Image Studio Lite software package (LI-COR Biosciences). Results were normalized using lamin C and GAPDH as controls (n=4 Oil-injected mice; n=4 Tamoxifen-injected mice). Statistical analysis was performed by two-tailed t-test when comparing normal populations or by Mann-Whitney test for non-normal comparisons. \*, p<0.05; \*\*, p<0.01; \*\*\*, p<0.001.
